# Supplementary material for: Purification Effects on β-HCH Removal and Bacterial Community Differences of Vertical-Flow Constructed Wetlands with Different Vegetation Plantations
Source: MDPI journal article supplement (doi:10.3390/su132313244), 2021-11-30
Supplement: s1 [file s1]

# Supporting Information

## Purification effects on $\beta$ -HCH removal and bacterial community differences of vertical-flow constructed wetlands with different vegetation plantations

Qing Chen <sup>1</sup>, Honghu Zeng <sup>1,3</sup>, Yanpeng Liang <sup>2,3\*</sup>, Litang Qin <sup>1,2</sup>, Guangsheng Peng <sup>1</sup>, Liangliang Huang <sup>1,3</sup> and Xiaohong Song <sup>1,2</sup>

- <sup>1</sup> College of Environmental Science and Engineering, Guilin University of Technology, Guilin 541004, China; chenQ130108@163qq.com (Q.C.); zenghonghu@glut.edu.cn (H.Z.); qinsar@163.com (L.Q.); pengguangsheng@glut.edu.cn (G.P.); llhuang@glut.edu.cn (L.H.); sxh215@163.com (X.S.)
- <sup>2</sup> Guangxi Key Laboratory of Environmental Pollution Control Theory and Technology, Guilin University of Technology, Guilin 541004, China
- <sup>3</sup> Collaborative Innovation Center for Water Pollution Control and Water Security in Karst Region, Guilin University of Technology, Guilin 541004, China
- \* Correspondence: ypliang1980@163.com (Y.L.); Tel.: +86-773-3693255 (Y.L.)

Table S1. The final removal rate of  $\beta$ -HCH in water with different constructed wetlands in different seasons

| Season     | K      | C      | M      | Z      | S      |
|------------|--------|--------|--------|--------|--------|
| Winter     | 93.45% | 95.88% | 96.49% | 95.75% | 96.06% |
| Winter + Y | 91.48% | 94.76% | 96.09% | 93.85% | 95.09% |
| Summer     | 92.98% | 98.17% | 97.84% | 94.47% | 95.23% |
| Summer + Y | 91.88% | 97.04% | 96.46% | 95.05% | 94.58% |

Y indicates that microbial inhibitors have been added. K refers to no plant, C refers to *Acorus calamus*, M refers to *Canna indica*, Z refers to *Thalia dealbata*, S refers to *Pontederia cordata*.

Table S2. The final uptake amount of  $\beta$ -HCH in various plants of constructed wetlands in different seasons

| Season     | C                     | M                     | Z                     | S                     |
|------------|-----------------------|-----------------------|-----------------------|-----------------------|
| Winter     | 2.96 $\mu\text{g/kg}$ | 3.92 $\mu\text{g/kg}$ | 1.98 $\mu\text{g/kg}$ | 3.38 $\mu\text{g/kg}$ |
| Winter + Y | 2.87 $\mu\text{g/kg}$ | 3.69 $\mu\text{g/kg}$ | 2.02 $\mu\text{g/kg}$ | 3.15 $\mu\text{g/kg}$ |
| Summer     | 3.96 $\mu\text{g/kg}$ | 4.91 $\mu\text{g/kg}$ | 2.55 $\mu\text{g/kg}$ | 3.52 $\mu\text{g/kg}$ |
| Summer + Y | 3.96 $\mu\text{g/kg}$ | 4.46 $\mu\text{g/kg}$ | 2.59 $\mu\text{g/kg}$ | 3.15 $\mu\text{g/kg}$ |

Y indicates that microbial inhibitors have been added. K refers to no plant, C refers to *Acorus calamus*, M refers to *Canna indica*, Z refers to *Thalia dealbata*, S refer to *Pontederia cordata*.

Table S3. The final content of  $\beta$ -HCH in the non-rhizosphere substrate of each constructed wetlands in different seasons

| Season     | K                      | C                      | M                      | Z                      | S                      |
|------------|------------------------|------------------------|------------------------|------------------------|------------------------|
| Winter     | 25.65 $\mu\text{g/kg}$ | 20.94 $\mu\text{g/kg}$ | 18.99 $\mu\text{g/kg}$ | 22.29 $\mu\text{g/kg}$ | 22.68 $\mu\text{g/kg}$ |
| Winter + Y | 28.68 $\mu\text{g/kg}$ | 22.48 $\mu\text{g/kg}$ | 20.24 $\mu\text{g/kg}$ | 23.37 $\mu\text{g/kg}$ | 20.71 $\mu\text{g/kg}$ |
| Summer     | 23.12 $\mu\text{g/kg}$ | 17.81 $\mu\text{g/kg}$ | 16.46 $\mu\text{g/kg}$ | 20.01 $\mu\text{g/kg}$ | 21.29 $\mu\text{g/kg}$ |
| Summer + Y | 27.38 $\mu\text{g/kg}$ | 19.18 $\mu\text{g/kg}$ | 18.94 $\mu\text{g/kg}$ | 24.08 $\mu\text{g/kg}$ | 23.41 $\mu\text{g/kg}$ |

Y indicates that microbial inhibitors have been added. K refers to no plant, C refers to *Acorus calamus*, M refers to *Canna indica*, Z refers to *Thalia dealbata*, S refers to *Pontederia cordata*.

Table S4. The final content of  $\beta$ -HCH in the rhizosphere substrate of each constructed wetland in different seasons

| Season     | C                      | M                      | Z                      | S                      |
|------------|------------------------|------------------------|------------------------|------------------------|
| Winter     | 15.12 $\mu\text{g/kg}$ | 16.18 $\mu\text{g/kg}$ | 17.56 $\mu\text{g/kg}$ | 16.54 $\mu\text{g/kg}$ |
| Winter + Y | 18.12 $\mu\text{g/kg}$ | 17.01 $\mu\text{g/kg}$ | 19.15 $\mu\text{g/kg}$ | 17.48 $\mu\text{g/kg}$ |
| Summer     | 14.33 $\mu\text{g/kg}$ | 15.13 $\mu\text{g/kg}$ | 16.72 $\mu\text{g/kg}$ | 15.69 $\mu\text{g/kg}$ |
| Summer + Y | 16.32 $\mu\text{g/kg}$ | 17.89 $\mu\text{g/kg}$ | 18.54 $\mu\text{g/kg}$ | 17.66 $\mu\text{g/kg}$ |

Y indicates that microbial inhibitors have been added. K refers to no plant, C refers to *Acorus calamus*, M refers to *Canna indica*, Z refers to *Thalia dealbata*, S refers to *Pontederia cordata*.

Table S5. The influence of seasons on the bacterial diversity index of constructed wetlands

| Samples Name | OTU  | Shannon | Chao1 | Ace  | Goods coverage |
|--------------|------|---------|-------|------|----------------|
| Winter       | 3129 | 9.160   | 3589  | 3573 | 0.985          |
| Summer       | 3272 | 9.342   | 4021  | 4080 | 0.987          |

Table S6. The bacterial community at phylum level varied among different stages of CWs during summer

| Taxonomy | <i>Proteobacteria</i> | <i>Firmicutes</i> | <i>Acidobacteria</i> | <i>Chloroflexi</i> | <i>Actinobacteria</i> | <i>Rokubacteria</i> | <i>Bacteroidetes</i> | <i>Planctomycetes</i> | <i>Verrucomicrobia</i> | <i>Gemmatimonadetes</i> | Others |
|----------|-----------------------|-------------------|----------------------|--------------------|-----------------------|---------------------|----------------------|-----------------------|------------------------|-------------------------|--------|
| K1       | 40.12%                | 0.30%             | 14.97%               | 11.91%             | 4.60%                 | 5.50%               | 5.60%                | 2.40%                 | 3.56%                  | 2.30%                   | 8.73%  |
| K15      | 49.26%                | 1.41%             | 11.44%               | 11.65%             | 2.93%                 | 5.20%               | 3.22%                | 1.78%                 | 2.65%                  | 1.97%                   | 8.50%  |
| K35      | 43.70%                | 1.49%             | 15.06%               | 10.96%             | 3.59%                 | 4.54%               | 4.26%                | 2.67%                 | 1.05%                  | 2.26%                   | 10.41% |
| K60      | 46.07%                | 8.43%             | 9.92%                | 9.36%              | 9.54%                 | 2.97%               | 2.14%                | 3.04%                 | 2.59%                  | 0.99%                   | 4.95%  |
| C1       | 43.74%                | 0.49%             | 14.68%               | 10.63%             | 5.21%                 | 5.18%               | 4.65%                | 3.02%                 | 2.28%                  | 2.38%                   | 7.74%  |
| C15      | 42.58%                | 0.26%             | 11.54%               | 13.76%             | 3.76%                 | 7.18%               | 3.52%                | 3.42%                 | 2.26%                  | 1.67%                   | 10.06% |
| C35      | 46.06%                | 0.28%             | 12.00%               | 10.36%             | 4.69%                 | 7.37%               | 3.47%                | 3.24%                 | 1.65%                  | 2.08%                   | 8.80%  |
| C60      | 40.89%                | 8.39%             | 8.70%                | 12.92%             | 11.29%                | 3.35%               | 2.52%                | 4.47%                 | 1.77%                  | 1.09%                   | 4.60%  |
| M1       | 41.82%                | 0.27%             | 8.78%                | 12.90%             | 3.72%                 | 7.52%               | 5.93%                | 3.21%                 | 2.49%                  | 1.21%                   | 12.14% |
| M15      | 65.24%                | 1.45%             | 5.16%                | 6.39%              | 1.60%                 | 3.42%               | 5.68%                | 1.62%                 | 1.11%                  | 1.02%                   | 7.31%  |
| M35      | 41.79%                | 0.85%             | 10.25%               | 14.61%             | 3.03%                 | 6.46%               | 4.94%                | 1.84%                 | 2.91%                  | 1.48%                   | 11.84% |
| M60      | 36.26%                | 16.35%            | 7.73%                | 13.48%             | 7.26%                 | 4.87%               | 2.06%                | 3.08%                 | 2.26%                  | 0.75%                   | 5.91%  |
| Z1       | 35.44%                | 0.84%             | 13.83%               | 14.23%             | 1.62%                 | 7.43%               | 4.59%                | 2.69%                 | 2.53%                  | 2.49%                   | 14.32% |
| Z15      | 45.37%                | 1.57%             | 11.95%               | 11.33%             | 2.93%                 | 6.46%               | 3.08%                | 2.48%                 | 1.57%                  | 2.53%                   | 10.75% |
| Z35      | 41.67%                | 1.00%             | 12.44%               | 11.66%             | 1.93%                 | 7.18%               | 3.26%                | 2.14%                 | 2.26%                  | 2.82%                   | 13.64% |
| Z60      | 37.21%                | 11.19%            | 9.74%                | 12.44%             | 10.35%                | 4.66%               | 3.23%                | 3.50%                 | 1.60%                  | 0.86%                   | 5.22%  |
| S1       | 75.87%                | 4.00%             | 1.18%                | 2.31%              | 3.40%                 | 0.94%               | 6.03%                | 0.61%                 | 0.38%                  | 0.34%                   | 4.94%  |
| S15      | 48.06%                | 0.34%             | 10.28%               | 12.97%             | 3.44%                 | 9.22%               | 2.17%                | 2.33%                 | 0.53%                  | 2.16%                   | 8.49%  |
| S35      | 48.81%                | 0.34%             | 8.31%                | 13.50%             | 3.26%                 | 8.76%               | 2.63%                | 2.63%                 | 1.76%                  | 1.40%                   | 8.60%  |
| S60      | 36.61%                | 14.25%            | 10.47%               | 12.96%             | 6.31%                 | 3.45%               | 3.09%                | 2.65%                 | 1.72%                  | 1.66%                   | 6.82%  |

Presented in the table are the top 10 species from the CWs bacterial community of each group at the phylum level, with the rest represented by others. **K** refers to no plant, **C** refers to *Acorus calamus*, **M** refers to *Canna indica*, **Z** refers to *Thalia dealbata*, **S** refers to *Pontederia cordata*. The numbers after **K**, **C**, **M**, **Z** and **S** indicate how many days the CWs had running.

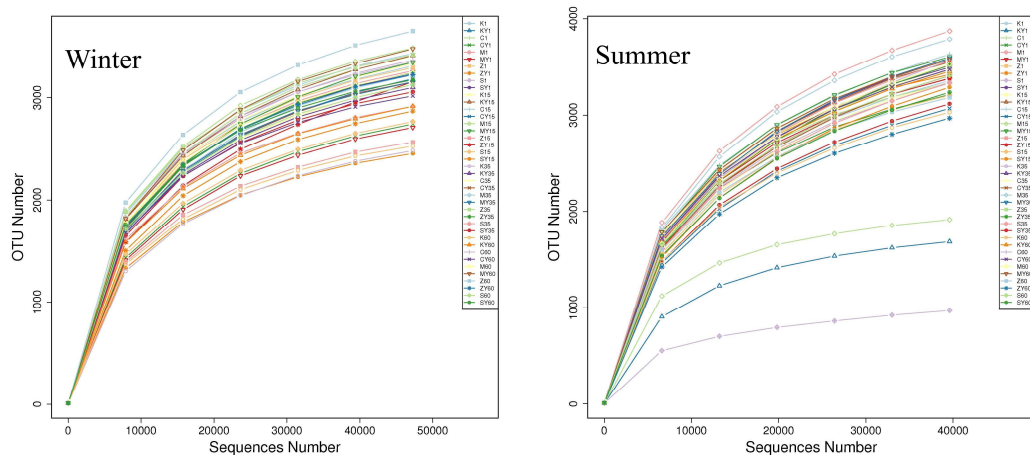

Figure. S1 Rarefaction analyses of multiple samples for winter and summer

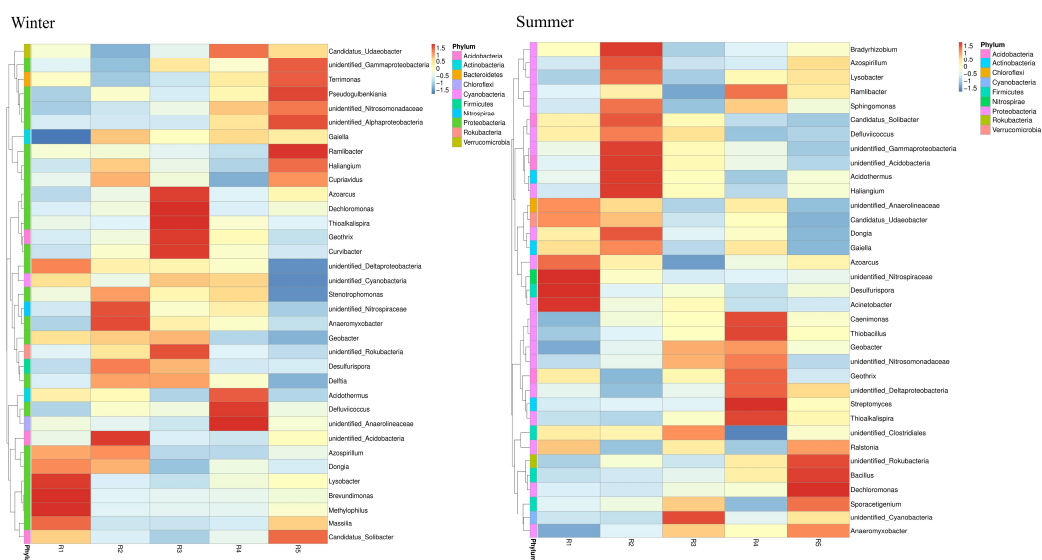

Figure. S2 Clustering heatmap at the genus level of each CWs for winter and summer, the darker the color indicates the higher abundance of that species in the component. R1 refers to no plant, R2 refers to *Acorus calamus*, R3 refers to *Canna indica*, R4 refers to *Thalia dealbata*, R5 refers to *Pontederia cordata*.
