# Supplementary material for: Purification Effects on β-HCH Removal and Bacterial Community Differences of Vertical-Flow Constructed Wetlands with Different Vegetation Plantations
Source: MDPI journal article supplement (doi:10.3390/su132313244), 2021-11-30
Supplement: s1 [file s1]

Archive with 1 entries (1 files):
- sustainability-1474953-supplementary.pdf
